# Supplementary material for: Modified Monosaccharides Content of Xanthan Gum Impairs Citrus Canker Disease by Affecting the Epiphytic Lifestyle of Xanthomonas citri subsp. citri
Source: MDPI journal article supplement (doi:10.3390/microorganisms9061176), 2021-05-29
Supplement: s1 [file s1]

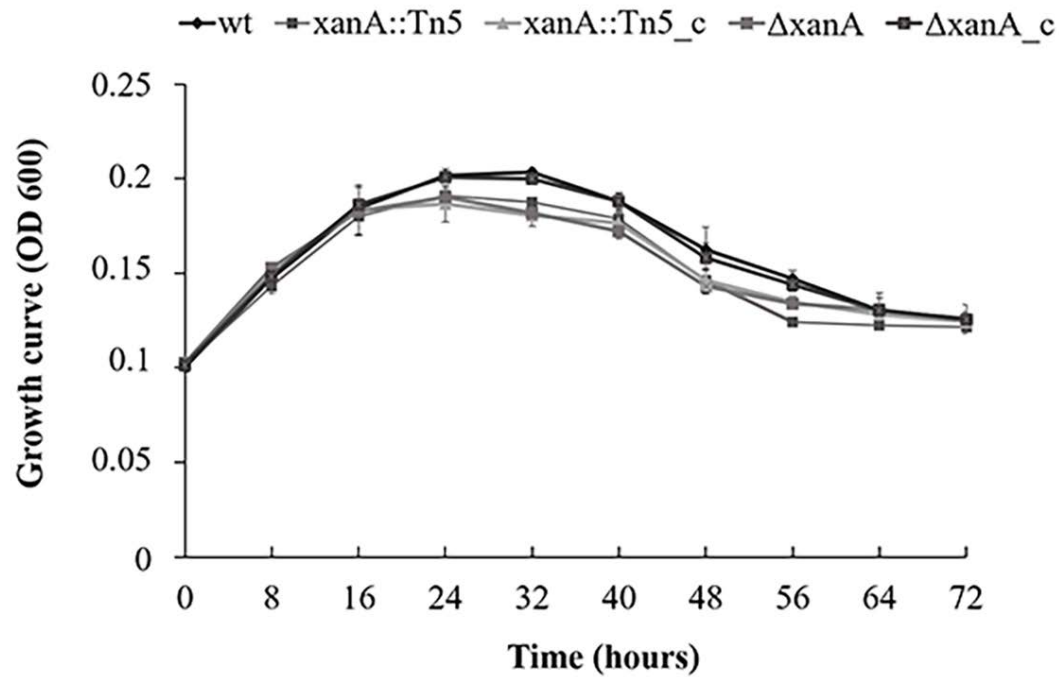

**Figure S1.** Growth curve of *X. citri* strains in NBY medium. Bacteria were grown at 28 °C in 96-well microtiter plates and measured in the Varioskan Flash Multimode Reader (Thermo Fisher Scientific) at 600 nm (OD600) for 72 hours. wt, wild-type; *xanA::Tn5*, transposon mutant; *xanA::Tn5\_c*, complemented transposon mutant;  $\Delta xanA$ , deletion mutant;  $\Delta xanA_c$ , complemented deletion mutant.
